# Supplementary material for: Substitution of Carbohydrates for Fats and Risk of Type 2 Diabetes among Korean Middle-Aged Adults: Findings from the Korean Genome and Epidemiology Study
Source: MDPI journal article supplement (doi:10.3390/nu14030654), 2022-02-03
Supplement: s1 [file s1]

# **Substitution of carbohydrates for fats and risk of type 2 diabetes among Korean middle-aged adults: findings from the Korean Genome and Epidemiology Study**

Hye Ah Lee<sup>1</sup>, Hyesook Park<sup>2,3</sup>

<sup>1</sup>Clinical Trial Center, Ewha Womans University Mokdong Hospital, Seoul, Republic of Korea,

<sup>2</sup>Department of Preventive Medicine, College of Medicine, Ewha Womans University, Seoul, Republic of Korea,

<sup>3</sup>Graduate Program in System Health Science and Engineering, Ewha Womans University, Seoul, Republic of Korea

**Table S1.** Risks of incident diabetes for high carbohydrate intake ( $\geq 65$  E% *vs.*  $< 65$  E%) according to genotype.

| No | SNP        | Genotype         |                  |                   | <i>P</i> -value <sup>a</sup> | <i>P</i> -value <sup>b</sup> |
|----|------------|------------------|------------------|-------------------|------------------------------|------------------------------|
|    |            | AA               | Aa               | aa                |                              |                              |
|    |            | HR (95% CI)      | HR (95% CI)      | HR (95% CI)       |                              |                              |
| 1  | rs2233580  | 1.05 (0.87-1.28) | 1.23 (0.80-1.87) | 1.43 (0.60-3.37)  | 0.513                        | 0.615                        |
| 2  | rs2206734  | 1.27 (0.93-1.73) | 1.07 (0.90-1.29) | 0.91 (0.68-1.23)  | 0.194                        | 0.467                        |
| 3  | rs2237895  | 1.04 (0.81-1.33) | 1.10 (0.90-1.35) | 1.17 (0.79-1.75)  | 0.655                        | 0.748                        |
| 4  | rs11960799 | 0.99 (0.76-1.28) | 1.12 (0.92-1.36) | 1.26 (0.87-1.84)  | 0.343                        | 0.633                        |
| 5  | rs75680863 | 1.09 (0.90-1.32) | 0.99 (0.58-1.70) | 0.90 (0.31-2.67)  | 0.744                        | 0.812                        |
| 6  | rs2237892  | 1.25 (0.96-1.63) | 1.03 (0.85-1.24) | 0.84 (0.59-1.22)  | 0.132                        | 0.397                        |
| 7  | rs10965250 | 1.05 (0.80-1.37) | 1.09 (0.91-1.32) | 1.14 (0.80-1.62)  | 0.748                        | 0.781                        |
| 8  | rs7901695  | 1.16 (0.96-1.41) | 0.61 (0.37-0.99) | 0.32 (0.12-0.85)  | <b>0.014</b>                 | 0.324                        |
| 9  | rs7754840  | 1.27 (0.93-1.75) | 1.08 (0.90-1.30) | 0.92 (0.69-1.24)  | 0.200                        | 0.436                        |
| 10 | rs1470579  | 0.95 (0.75-1.20) | 1.16 (0.94-1.43) | 1.42 (0.94-2.14)  | 0.130                        | 0.445                        |
| 11 | rs576674   | 1.00 (0.82-1.23) | 1.30 (0.95-1.79) | 1.70 (0.90-3.22)  | 0.142                        | 0.378                        |
| 12 | rs7593730  | 1.22 (0.98-1.52) | 0.88 (0.68-1.13) | 0.63 (0.37-1.06)  | <b>0.035</b>                 | 0.278                        |
| 13 | rs5219     | 1.15 (0.88-1.52) | 1.06 (0.88-1.27) | 0.97 (0.69-1.36)  | 0.490                        | 0.619                        |
| 14 | rs5015480  | 1.03 (0.83-1.28) | 1.16 (0.90-1.51) | 1.31 (0.78-2.20)  | 0.433                        | 0.693                        |
| 15 | rs1387153  | 0.98 (0.74-1.29) | 1.10 (0.91-1.32) | 1.23 (0.87-1.75)  | 0.377                        | 0.646                        |
| 16 | rs4430796  | 1.34 (1.03-1.74) | 0.99 (0.81-1.19) | 0.73 (0.50-1.05)  | <b>0.021</b>                 | 0.248                        |
| 17 | rs11634397 | 1.02 (0.84-1.23) | 1.49 (0.96-2.31) | 2.18 (0.90-5.30)  | 0.109                        | 0.435                        |
| 18 | rs2943641  | 1.03 (0.85-1.24) | 1.73 (0.94-3.20) | 2.92 (0.85-10.04) | 0.108                        | 0.519                        |
| 19 | rs635634   | 1.00 (0.79-1.26) | 1.16 (0.92-1.45) | 1.34 (0.85-2.12)  | 0.310                        | 0.621                        |
| 20 | rs4402960  | 0.92 (0.73-1.17) | 1.19 (0.96-1.48) | 1.54 (1.00-2.36)  | 0.062                        | 0.370                        |
| 21 | rs10758593 | 1.16 (0.89-1.52) | 1.06 (0.88-1.28) | 0.97 (0.69-1.37)  | 0.477                        | 0.673                        |
| 22 | rs1153188  | 1.08 (0.90-1.30) | 1.10 (0.51-2.38) | 1.12 (0.24-5.29)  | 0.964                        | 0.964                        |
| 23 | rs757110   | 1.17 (0.88-1.54) | 1.07 (0.89-1.28) | 0.98 (0.70-1.36)  | 0.482                        | 0.642                        |
| 24 | rs7177055  | 1.16 (0.89-1.52) | 1.06 (0.88-1.28) | 0.97 (0.68-1.37)  | 0.476                        | 0.714                        |

AA, major-allele homozygotes; Aa, heterozygotes, aa, minor-allele homozygotes

SNP, single nucleotide polymorphism; HR, hazard ratio; 95% CI, 95% confidence interval

<sup>a</sup> *P*-value for interaction between carbohydrate intake and genotypes

<sup>b</sup> Adjusted *P*-value calculated using the Benjamini–Hochberg method

HRs with 95% CIs were estimated after adjustments for age, rural region, educational level, current smoking status, alcohol intake, physical activity, BMI, and total energy.

**Table S2.** Risks of incident diabetes for high carbohydrate intake ( $\geq 65$  E% *vs.*  $< 65$  E%) according to genotype and stratified according to sex

| No | SNP        | Male             |                  |                  |                    |                    | Female           |                  |                   |                    |                    |
|----|------------|------------------|------------------|------------------|--------------------|--------------------|------------------|------------------|-------------------|--------------------|--------------------|
|    |            | AA               | Aa               | aa               | <i>P</i>           | <i>P</i>           | AA               | Aa               | aa                | <i>P</i>           | <i>P</i>           |
|    |            | HR (95% CI)      | HR (95% CI)      | HR (95% CI)      | value <sup>a</sup> | value <sup>b</sup> | HR (95% CI)      | HR (95% CI)      | HR (95% CI)       | value <sup>a</sup> | value <sup>b</sup> |
| 1  | rs2233580  | 1.11 (0.87-1.43) | 1.47 (0.85-2.55) | 1.95 (0.64-5.92) | 0.347              | 0.490              | 0.99 (0.73-1.35) | 0.99 (0.51-1.94) | 0.99 (0.26-3.85)  | 0.999              | 0.999              |
| 2  | rs2206734  | 1.41 (0.95-2.10) | 1.16 (0.92-1.46) | 0.96 (0.64-1.42) | 0.240              | 0.443              | 1.13 (0.69-1.87) | 0.98 (0.74-1.31) | 0.86 (0.54-1.36)  | 0.481              | 1.050              |
| 3  | rs2237895  | 1.14 (0.83-1.57) | 1.18 (0.91-1.54) | 1.23 (0.73-2.07) | 0.837              | 0.914              | 0.92 (0.62-1.36) | 1.04 (0.75-1.44) | 1.18 (0.63-2.23)  | 0.555              | 0.833              |
| 4  | rs11960799 | 1.08 (0.78-1.50) | 1.21 (0.94-1.55) | 1.35 (0.82-2.22) | 0.519              | 0.623              | 0.92 (0.61-1.39) | 1.02 (0.75-1.39) | 1.14 (0.64-2.01)  | 0.599              | 0.845              |
| 5  | rs75680863 | 1.24 (0.97-1.59) | 0.66 (0.34-1.29) | 0.35 (0.09-1.35) | 0.079              | 0.472              | 0.93 (0.69-1.25) | 1.82 (0.66-5.01) | 3.56 (0.46-27.50) | 0.211              | 1.264              |
| 6  | rs2237892  | 1.43 (1.02-2.01) | 1.09 (0.85-1.39) | 0.83 (0.52-1.32) | 0.097              | 0.389              | 1.11 (0.72-1.71) | 0.95 (0.70-1.29) | 0.82 (0.45-1.48)  | 0.482              | 0.963              |
| 7  | rs10965250 | 1.17 (0.83-1.66) | 1.17 (0.92-1.49) | 1.17 (0.75-1.83) | 0.993              | 0.993              | 0.89 (0.58-1.36) | 1.02 (0.75-1.39) | 1.17 (0.65-2.11)  | 0.514              | 0.948              |
| 8  | rs7901695  | 1.25 (0.97-1.59) | 0.70 (0.37-1.36) | 0.40 (0.11-1.51) | 0.108              | 0.372              | 1.09 (0.80-1.48) | 0.49 (0.24-1.00) | 0.22 (0.05-0.94)  | <b>0.041</b>       | 0.490              |
| 9  | rs7754840  | 1.33 (0.90-1.97) | 1.16 (0.92-1.47) | 1.02 (0.69-1.52) | 0.424              | 0.565              | 1.30 (0.76-2.22) | 1.01 (0.75-1.36) | 0.79 (0.51-1.22)  | 0.213              | 1.021              |
| 10 | rs1470579  | 0.99 (0.73-1.35) | 1.28 (0.98-1.68) | 1.65 (0.96-2.82) | 0.149              | 0.324              | 0.90 (0.62-1.31) | 1.05 (0.75-1.45) | 1.22 (0.64-2.30)  | 0.470              | 1.128              |
| 11 | rs576674   | 1.03 (0.79-1.33) | 1.64 (1.06-2.53) | 2.62 (1.08-6.33) | 0.057              | 0.459              | 0.99 (0.71-1.37) | 1.00 (0.63-1.58) | 1.00 (0.40-2.51)  | 0.981              | 1.024              |
| 12 | rs7593730  | 1.36 (1.02-1.81) | 0.92 (0.67-1.27) | 0.62 (0.32-1.20) | 0.050              | 0.604              | 1.07 (0.76-1.51) | 0.86 (0.55-1.34) | 0.69 (0.27-1.73)  | 0.420              | 1.260              |
| 13 | rs5219     | 1.46 (1.01-2.09) | 1.10 (0.87-1.40) | 0.84 (0.55-1.29) | 0.090              | 0.431              | 0.87 (0.57-1.34) | 1.03 (0.76-1.39) | 1.21 (0.68-2.17)  | 0.430              | 1.147              |
| 14 | rs5015480  | 1.06 (0.80-1.39) | 1.37 (0.98-1.91) | 1.78 (0.91-3.45) | 0.186              | 0.371              | 1.03 (0.73-1.44) | 0.93 (0.62-1.41) | 0.85 (0.37-1.95)  | 0.702              | 0.886              |
| 15 | rs1387153  | 1.04 (0.73-1.50) | 1.19 (0.94-1.51) | 1.37 (0.87-2.13) | 0.424              | 0.536              | 0.91 (0.59-1.40) | 1.01 (0.75-1.36) | 1.13 (0.64-2.00)  | 0.605              | 0.806              |
| 16 | rs4430796  | 1.63 (1.17-2.26) | 0.97 (0.75-1.24) | 0.57 (0.35-0.94) | <b>0.002</b>       | 0.055              | 1.03 (0.67-1.60) | 1.00 (0.74-1.35) | 0.97 (0.54-1.73)  | 0.884              | 1.061              |
| 17 | rs11634397 | 1.11 (0.87-1.42) | 1.53 (0.88-2.68) | 2.12 (0.69-6.52) | 0.281              | 0.450              | 0.92 (0.68-1.25) | 1.50 (0.72-3.11) | 2.44 (0.56-10.64) | 0.216              | 0.865              |

|    |            |                  |                  |                   |       |       |                  |                  |                   |              |       |
|----|------------|------------------|------------------|-------------------|-------|-------|------------------|------------------|-------------------|--------------|-------|
| 18 | rs2943641  | 1.10 (0.87-1.39) | 2.22 (0.95-5.19) | 4.47 (0.81-24.79) | 0.117 | 0.313 | 0.96 (0.72-1.30) | 1.28 (0.53-3.08) | 1.71 (0.29-9.94)  | 0.538        | 0.922 |
| 19 | rs635634   | 1.06 (0.79-1.42) | 1.29 (0.95-1.73) | 1.56 (0.85-2.87)  | 0.303 | 0.454 | 0.98 (0.67-1.44) | 1.00 (0.71-1.42) | 1.03 (0.51-2.07)  | 0.924        | 0.999 |
| 20 | rs4402960  | 1.00 (0.74-1.35) | 1.29 (0.98-1.71) | 1.68 (0.96-2.94)  | 0.144 | 0.347 | 0.85 (0.59-1.23) | 1.10 (0.78-1.55) | 1.42 (0.73-2.77)  | 0.232        | 0.796 |
| 21 | rs10758593 | 1.01 (0.73-1.41) | 1.23 (0.96-1.57) | 1.48 (0.93-2.37)  | 0.249 | 0.427 | 1.50 (0.94-2.39) | 0.92 (0.69-1.23) | 0.57 (0.35-0.94)  | <b>0.015</b> | 0.350 |
| 22 | rs1153188  | 1.17 (0.92-1.48) | 1.15 (0.39-3.40) | 1.13 (0.13-9.96)  | 0.977 | 1.019 | 0.99 (0.74-1.33) | 1.06 (0.35-3.22) | 1.13 (0.12-10.63) | 0.910        | 0.999 |
| 23 | rs757110   | 1.46 (1.01-2.12) | 1.14 (0.90-1.44) | 0.88 (0.59-1.33)  | 0.116 | 0.348 | 0.90 (0.58-1.37) | 1.02 (0.75-1.37) | 1.15 (0.65-2.04)  | 0.541        | 0.865 |
| 24 | rs7177055  | 1.14 (0.81-1.59) | 1.18 (0.92-1.50) | 1.22 (0.77-1.93)  | 0.835 | 0.954 | 1.34 (0.84-2.12) | 0.92 (0.69-1.24) | 0.64 (0.38-1.09)  | 0.074        | 0.594 |

AA, major-allele homozygotes; Aa, heterozygotes, aa, minor-allele homozygotes

SNP, single nucleotide polymorphism; HR, hazard ratio; 95% CI, 95% confidence interval

<sup>a</sup> *P*-value for interaction between carbohydrate intake and genotypes

<sup>b</sup> Adjusted *P*-value calculated using the Benjamini–Hochberg method

HRs with 95% CIs were estimated after adjustments for age, rural region, educational level, current smoking status, alcohol intake, physical activity, BMI, and total energy.

**Table S3.** Risks of incident diabetes when replacing fats with carbohydrates according to genotype and stratified according to energy adjusted model

| No | SNP        | Multivariate nutrient density model (with energy in the model) <sup>c</sup> |                  |                  |                    |                    | Nutrient residual model (with energy in the model) <sup>d</sup> |                  |                  |                    |                    |
|----|------------|-----------------------------------------------------------------------------|------------------|------------------|--------------------|--------------------|-----------------------------------------------------------------|------------------|------------------|--------------------|--------------------|
|    |            | AA                                                                          | Aa               | aa               | <i>P</i>           | <i>P</i>           | AA                                                              | Aa               | aa               | <i>P</i>           | <i>P</i>           |
|    |            | HR (95% CI)                                                                 | HR (95% CI)      | HR (95% CI)      | value <sup>a</sup> | value <sup>b</sup> | HR (95% CI)                                                     | HR (95% CI)      | HR (95% CI)      | value <sup>a</sup> | value <sup>b</sup> |
| 1  | rs2233580  | 1.12 (1.02-1.24)                                                            | 1.18 (1.03-1.34) | 1.24 (0.99-1.54) | 0.389              | 0.934              | 1.04 (1.00-1.07)                                                | 1.05 (0.99-1.10) | 1.06 (0.97-1.15) | 0.699              | 0.999              |
| 2  | rs2206734  | 1.15 (1.03-1.29)                                                            | 1.13 (1.03-1.24) | 1.11 (0.99-1.24) | 0.555              | 0.784              | 1.05 (1.00-1.09)                                                | 1.04 (1.00-1.07) | 1.03 (0.99-1.07) | 0.470              | 0.999              |
| 3  | rs2237895  | 1.10 (0.99-1.23)                                                            | 1.14 (1.03-1.26) | 1.18 (1.04-1.35) | 0.310              | 0.999              | 1.03 (0.99-1.07)                                                | 1.04 (1.00-1.08) | 1.05 (0.99-1.10) | 0.631              | 0.999              |
| 4  | rs11960799 | 1.11 (1.00-1.24)                                                            | 1.14 (1.03-1.25) | 1.16 (1.02-1.32) | 0.536              | 0.804              | 1.03 (0.99-1.07)                                                | 1.04 (1.01-1.08) | 1.06 (1.01-1.11) | 0.193              | 0.999              |
| 5  | rs75680863 | 1.13 (1.03-1.25)                                                            | 1.09 (0.93-1.28) | 1.05 (0.79-1.40) | 0.621              | 0.784              | 1.04 (1.00-1.07)                                                | 1.03 (0.97-1.10) | 1.03 (0.92-1.15) | 0.877              | 0.999              |
| 6  | rs2237892  | 1.13 (1.02-1.26)                                                            | 1.13 (1.02-1.24) | 1.12 (0.99-1.28) | 0.877              | 0.877              | 1.04 (1.00-1.08)                                                | 1.04 (1.00-1.07) | 1.03 (0.98-1.08) | 0.807              | 0.999              |
| 7  | rs10965250 | 1.11 (1.00-1.23)                                                            | 1.14 (1.04-1.26) | 1.18 (1.04-1.33) | 0.373              | 0.995              | 1.04 (1.00-1.08)                                                | 1.04 (1.00-1.08) | 1.04 (0.99-1.09) | 0.957              | 0.957              |
| 8  | rs7901695  | 1.15 (1.04-1.26)                                                            | 0.98 (0.81-1.18) | 0.84 (0.59-1.18) | 0.076              | 0.999              | 1.05 (1.01-1.08)                                                | 0.98 (0.92-1.05) | 0.92 (0.82-1.04) | 0.058              | 0.999              |
| 9  | rs7754840  | 1.14 (1.02-1.28)                                                            | 1.13 (1.03-1.24) | 1.11 (0.99-1.25) | 0.681              | 0.743              | 1.05 (1.00-1.09)                                                | 1.04 (1.00-1.07) | 1.03 (0.99-1.07) | 0.437              | 0.999              |
| 10 | rs1470579  | 1.11 (1.00-1.23)                                                            | 1.14 (1.03-1.26) | 1.17 (1.02-1.34) | 0.431              | 0.796              | 1.03 (0.99-1.08)                                                | 1.04 (1.00-1.07) | 1.04 (0.99-1.09) | 0.825              | 0.999              |
| 11 | rs576674   | 1.11 (1.01-1.23)                                                            | 1.17 (1.04-1.31) | 1.23 (1.03-1.47) | 0.272              | 0.999              | 1.03 (0.99-1.07)                                                | 1.05 (1.01-1.09) | 1.07 (1.00-1.14) | 0.310              | 0.999              |
| 12 | rs7593730  | 1.16 (1.05-1.28)                                                            | 1.08 (0.97-1.20) | 1.00 (0.85-1.18) | 0.087              | 0.999              | 1.05 (1.01-1.08)                                                | 1.02 (0.98-1.06) | 0.99 (0.93-1.06) | 0.121              | 0.999              |
| 13 | rs5219     | 1.15 (1.03-1.28)                                                            | 1.12 (1.02-1.24) | 1.10 (0.98-1.24) | 0.480              | 0.823              | 1.04 (1.00-1.08)                                                | 1.04 (1.00-1.07) | 1.04 (0.99-1.08) | 0.898              | 0.980              |
| 14 | rs5015480  | 1.11 (1.00-1.23)                                                            | 1.16 (1.04-1.29) | 1.22 (1.04-1.42) | 0.226              | 0.999              | 1.03 (0.99-1.07)                                                | 1.05 (1.00-1.09) | 1.06 (1.00-1.13) | 0.390              | 0.999              |
| 15 | rs1387153  | 1.11 (0.99-1.24)                                                            | 1.13 (1.03-1.25) | 1.15 (1.02-1.30) | 0.590              | 0.787              | 1.03 (0.99-1.07)                                                | 1.04 (1.00-1.08) | 1.05 (1.00-1.10) | 0.410              | 0.999              |
| 16 | rs4430796  | 1.14 (1.03-1.27)                                                            | 1.12 (1.02-1.24) | 1.10 (0.96-1.26) | 0.628              | 0.754              | 1.04 (1.00-1.08)                                                | 1.03 (1.00-1.07) | 1.03 (0.97-1.08) | 0.594              | 0.999              |

|    |            |                  |                  |                  |       |       |                  |                  |                  |       |       |
|----|------------|------------------|------------------|------------------|-------|-------|------------------|------------------|------------------|-------|-------|
| 17 | rs11634397 | 1.12 (1.02-1.23) | 1.18 (1.04-1.35) | 1.25 (1.00-1.57) | 0.304 | 0.999 | 1.03 (1.00-1.07) | 1.06 (1.01-1.11) | 1.08 (0.99-1.18) | 0.285 | 0.999 |
| 18 | rs2943641  | 1.12 (1.02-1.23) | 1.20 (1.03-1.40) | 1.28 (0.97-1.69) | 0.324 | 0.972 | 1.03 (1.00-1.07) | 1.06 (1.00-1.12) | 1.09 (0.97-1.21) | 0.374 | 0.999 |
| 19 | rs635634   | 1.11 (1.00-1.23) | 1.15 (1.04-1.27) | 1.18 (1.03-1.36) | 0.390 | 0.851 | 1.03 (1.00-1.07) | 1.04 (1.00-1.08) | 1.05 (0.99-1.10) | 0.632 | 0.999 |
| 20 | rs4402960  | 1.09 (0.98-1.21) | 1.15 (1.04-1.27) | 1.21 (1.05-1.38) | 0.160 | 0.999 | 1.03 (0.99-1.07) | 1.04 (1.00-1.08) | 1.06 (1.00-1.11) | 0.287 | 0.999 |
| 21 | rs10758593 | 1.12 (1.01-1.25) | 1.13 (1.03-1.25) | 1.14 (1.01-1.30) | 0.758 | 0.791 | 1.03 (0.99-1.08) | 1.04 (1.00-1.08) | 1.04 (1.00-1.09) | 0.685 | 0.999 |
| 22 | rs1153188  | 1.13 (1.02-1.24) | 1.22 (0.96-1.55) | 1.32 (0.84-2.09) | 0.489 | 0.782 | 1.04 (1.00-1.07) | 1.03 (0.95-1.13) | 1.03 (0.87-1.22) | 0.933 | 0.974 |
| 23 | rs757110   | 1.16 (1.04-1.30) | 1.13 (1.03-1.24) | 1.10 (0.98-1.24) | 0.397 | 0.794 | 1.04 (1.00-1.09) | 1.04 (1.00-1.08) | 1.04 (0.99-1.08) | 0.753 | 0.999 |
| 24 | rs7177055  | 1.12 (1.00-1.24) | 1.13 (1.03-1.25) | 1.15 (1.02-1.31) | 0.631 | 0.721 | 1.04 (0.99-1.08) | 1.04 (1.00-1.07) | 1.04 (0.99-1.09) | 0.844 | 0.999 |

AA, major-allele homozygotes; Aa, heterozygotes, aa, minor-allele homozygotes

SNP, single nucleotide polymorphism; HR, hazard ratio; 95% CI, 95% confidence interval

<sup>a</sup> *P*-value for interaction between carbohydrate intake and genotypes

<sup>b</sup> Adjusted *P*-value calculated using the Benjamini–Hochberg method

<sup>c</sup> HRs with 95% CIs were estimated after adjustments for sex, age, rural region, educational level, current smoking status, alcohol intake, physical activity, body mass index (BMI), total energy, and protein (per 5 E%).

<sup>d</sup> HRs with 95% CIs were estimated after adjustments for age, rural region, educational level, current smoking status, alcohol intake, physical activity, BMI, total energy, and protein (per 10 g).
